# Supplementary material for: Insecticidal Efficacy of Microbial-Mediated Synthesized Copper Nano-Pesticide against Insect Pests and Non-Target Organisms
Source: MDPI journal article supplement (doi:10.3390/ijerph181910536), 2021-10-08
Supplement: s1 [file s1]

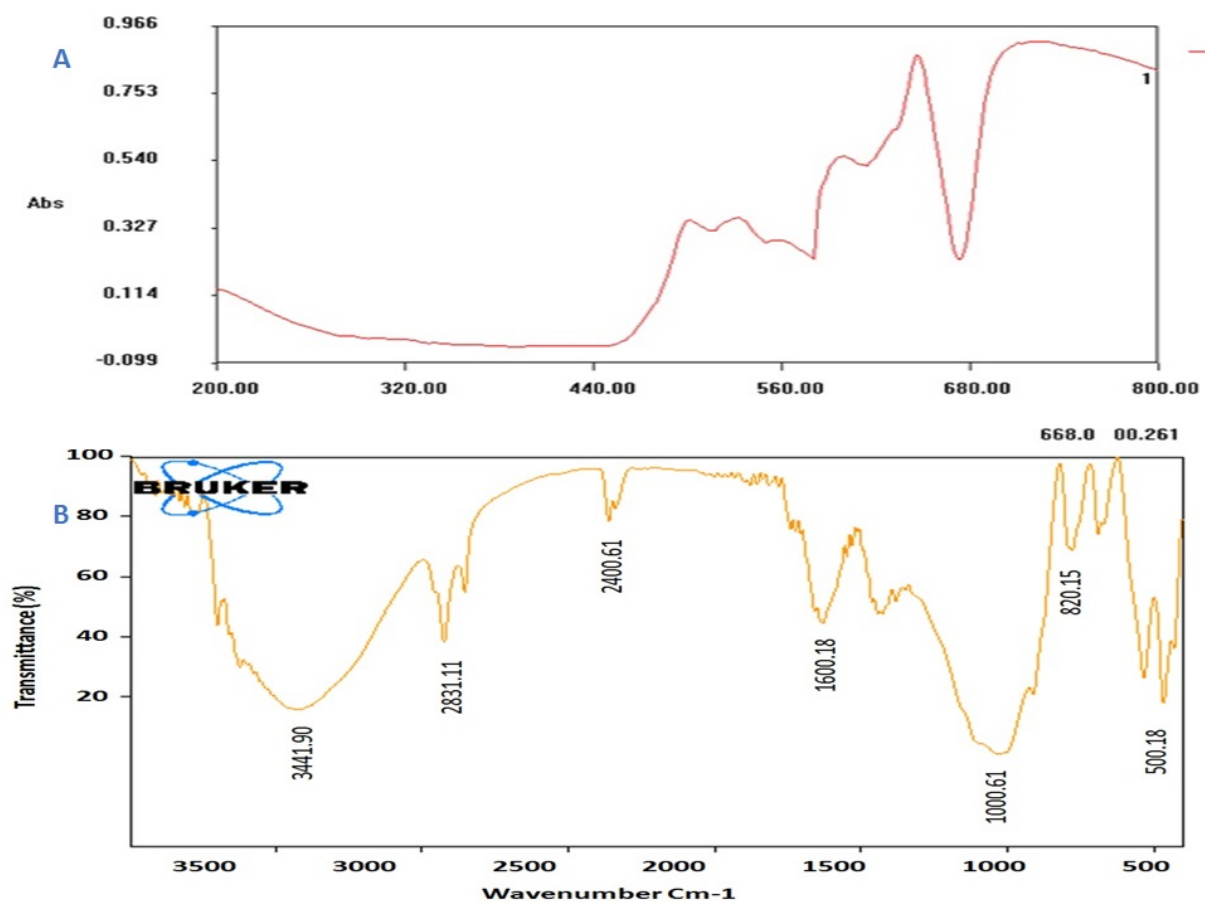

**Figure S1:** (A) UV-visible Spectrophotometer absorption range at 670 nm; (B) FT-IR analysis shows a several functional groups from green cluster copper nano-pesticide synthesized from *M. robertsii*

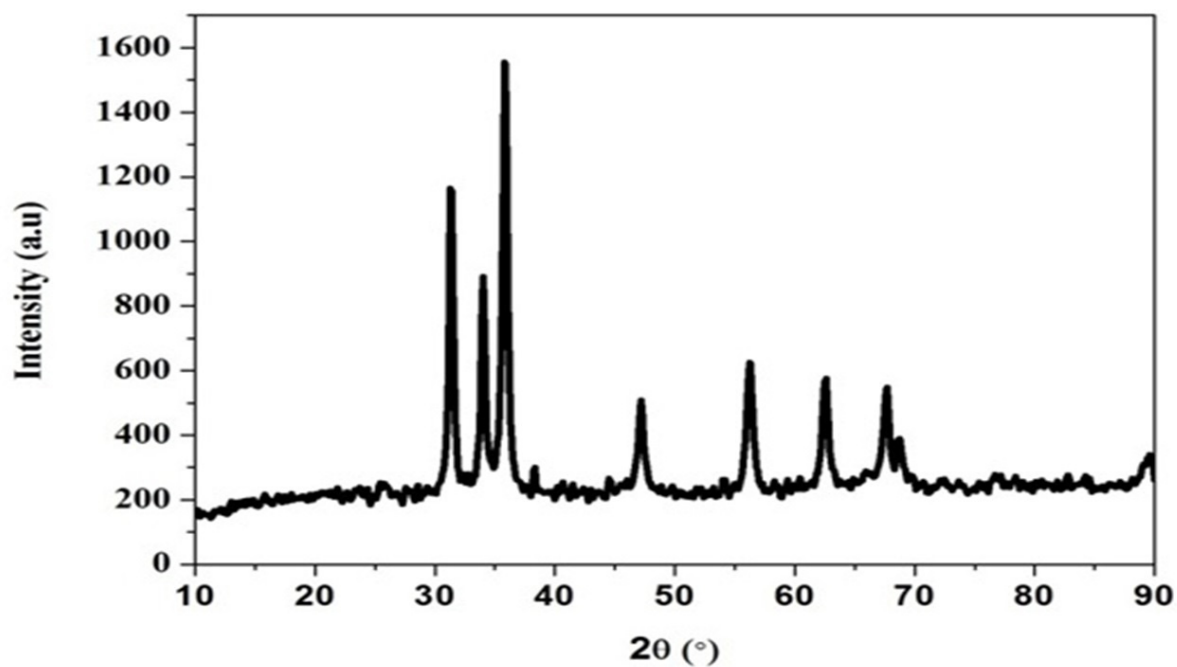

**Figure S2:** XRD shows 3 strongest peak values at 29.4389, 35.1523 and 36.8562 this strongest peak value tells about the crystalline structure of copper nano-particles

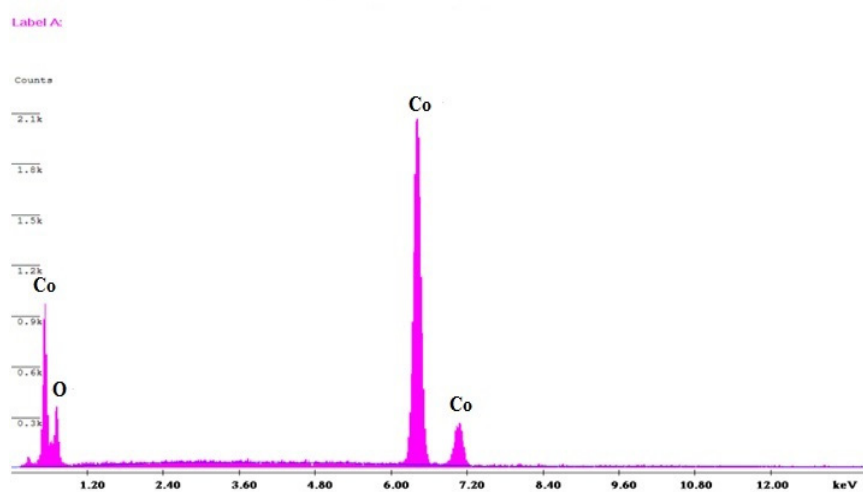

**Figure S3.** EDaX image gave an exact elementary composition and the ranges from 0 to 20 keV. It shows some elements such as O and CU.



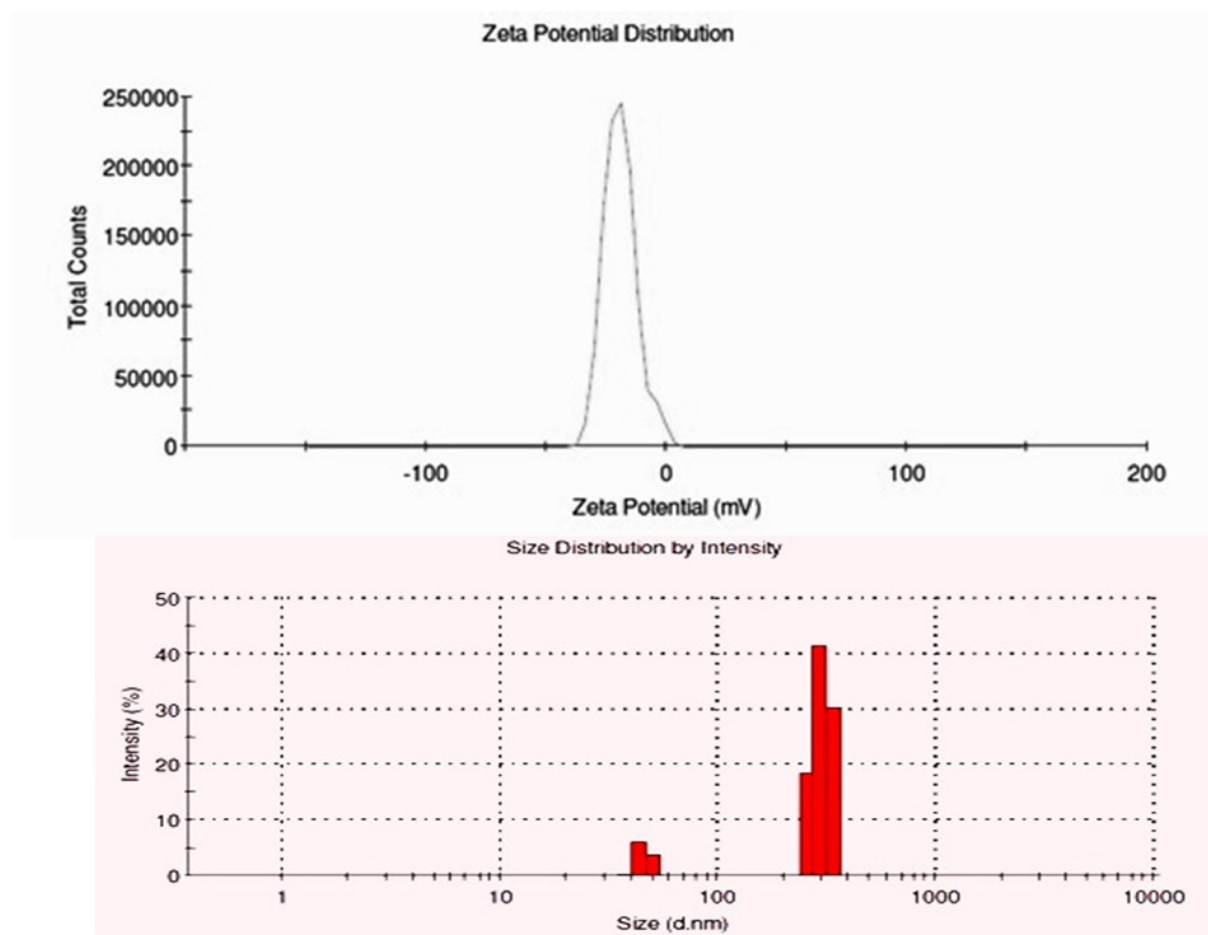

**Figure S6:** Zeta potential and DLS of green synthesized copper nanoparticles

**Table S1:** FT-IR functional group's identification of green cluster copper nano-pesticide synthesized from entomopathogenic fungi *M. robertsii*

| S.no | Vibrational assignment | Observed wavenumber (cm <sup>-1</sup> ) | Functional group | Visible intensity       |
|------|------------------------|-----------------------------------------|------------------|-------------------------|
| 1    | ArO-H H bonded         | 3441.90                                 | Phenols          | Broad peak              |
| 2    | -CH <sub>2</sub> -     | 2831.11                                 | Alkanes          | Medium small sharp peak |
| 3    | Ar-CH=CHR              | 2400.61                                 | Alkenes          | Medium peak             |
| 4    | C-O stretching         | 1600.18                                 | Carboxylic acids | Small broad peak        |
| 5    | C-H out of plane       | 1000.61                                 | Aromatics        | Medium peak             |
| 6    | =CH out of plane       | 820.15                                  | Alkenes          | Medium peak             |
| 7    | S-S disulfide asym     | 500.18                                  | Misc             | Medium sharp peak       |
